# Supplementary material for: Polymorphisms in STING Affect Human Innate Immune Responses to Poxviruses
Source: Front Immunol. 2020 Oct 14;11:567348. doi: 10.3389/fimmu.2020.567348 (PMC7591719; doi:10.3389/fimmu.2020.567348)

Supplementary Material

Polymorphisms in STING affect human innate immune responses to poxviruses

**Richard B. Kennedy, PhD1*; Iana H. Haralambieva, PhD1; Inna G. Ovsyannikova, PhD1; Emily A. Voigt, PhD1; Beth R. Larrabee2; Daniel J. Schaid, PhD2; Michael T. Zimmermann, PhD3; Ann L. Oberg, PhD2; Gregory A. Poland,MD1**

1Mayo Clinic Vaccine Research Group, Mayo Clinic, 200 First Street SW, Rochester, MN, 55905 USA

2Division of Biomedical Statistics and Informatics, Department of Health Science Research,

Mayo Clinic, 200 First Street SW, Rochester, MN 55905 USA

3Bioinformatics Research and Development Laboratory, Genomics Sciences and Precision Medicine Center, Medical College of Wisconsin, 8701 Watertown Plank Rd., Milwaukee, WI, 53226, USA

**
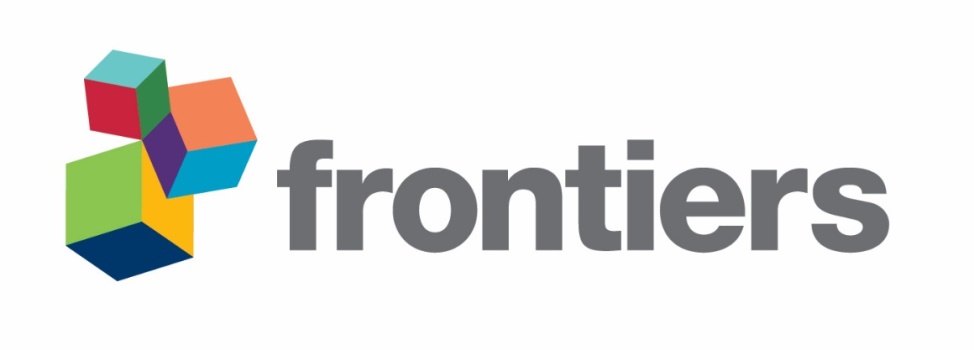
**

# Supplementary Figures and Tables

**Supplementary Table 1**

| **Supplementary Table 1. Cohort Demographics** | |
| --- | --- |
| *Total subjects* | 1,653 |
| *Gender* |  |
| Male | 1,365 (82.6%) |
| Female | 288 (17.4%) |
| *Age* | 19 – 41 years old |
| *Ethnicity* |  |
| Hispanic/Latino | 381 (23%) |
| Not Hispanic/Latino | 1248 (75.5%) |
| Unknown | 24 (1.5%) |
| *Race* |  |
| American Indian/Alaska Native | 26 (1.6%) |
| Asian, Native Hawaiian, Pacific Islander | 12 (0.7%) |
| African American | 25 (1.5%) |
| Caucasian | 1,351 (81.7%) |
| More than one race | 81 (4.9%) |
| Other | 120 (7.3%) |
| Unknown | 38 (2.3%) |
| *Time since immunization* |  |
| Median | 1.7 years |
| Range | 1.1 – 2.8 years |

**Supplementary Figure 1.**


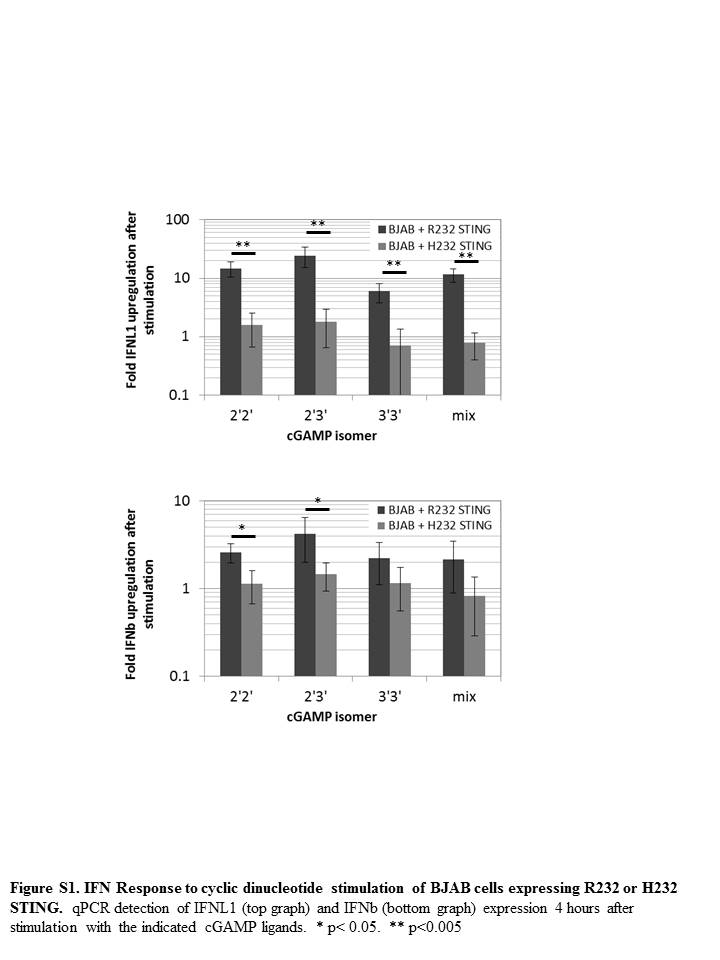


**Supplementary Figure 2.**


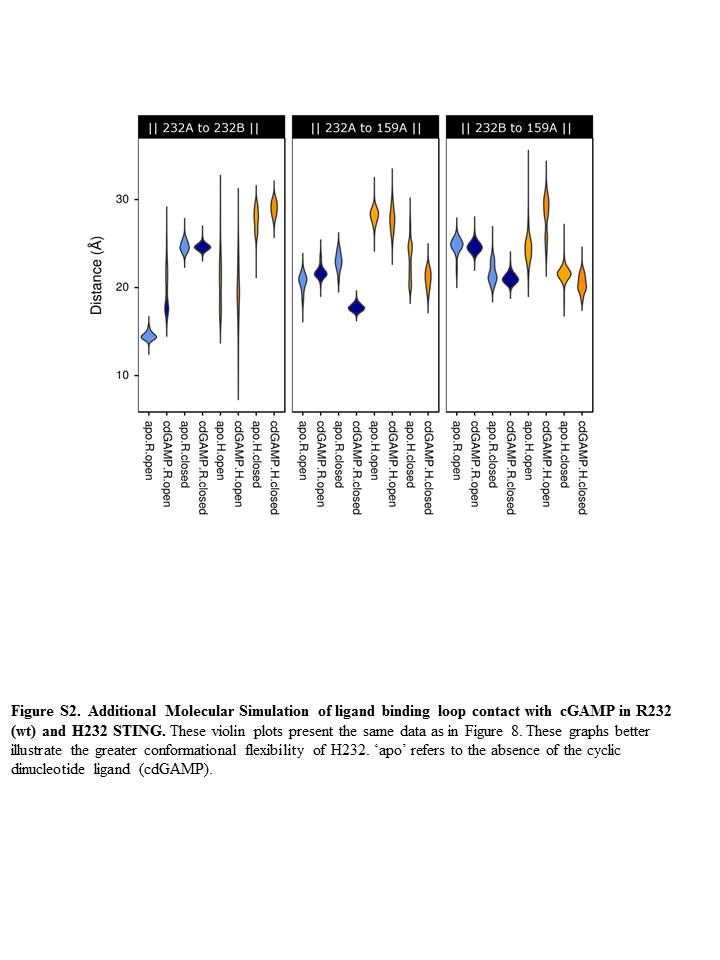

Supplement: Supplementary file 1 [file Table_1.docx]
